# Supplementary material for: Intrathymic AAV delivery results in therapeutic site-specific integration at TCR loci in mice
Source: PubMed Central journal article supplement — Blood. 2023 Feb 16;141(19):2316–29. doi: 10.1182/blood.2022017378 (PMC10356579; doi:10.1182/blood.2022017378), 2023-02-16
Supplement: BLOOD_BLD-2022-017378-mmc1.pdf [file BLOOD_BLD-2022-017378-mmc1.pdf]

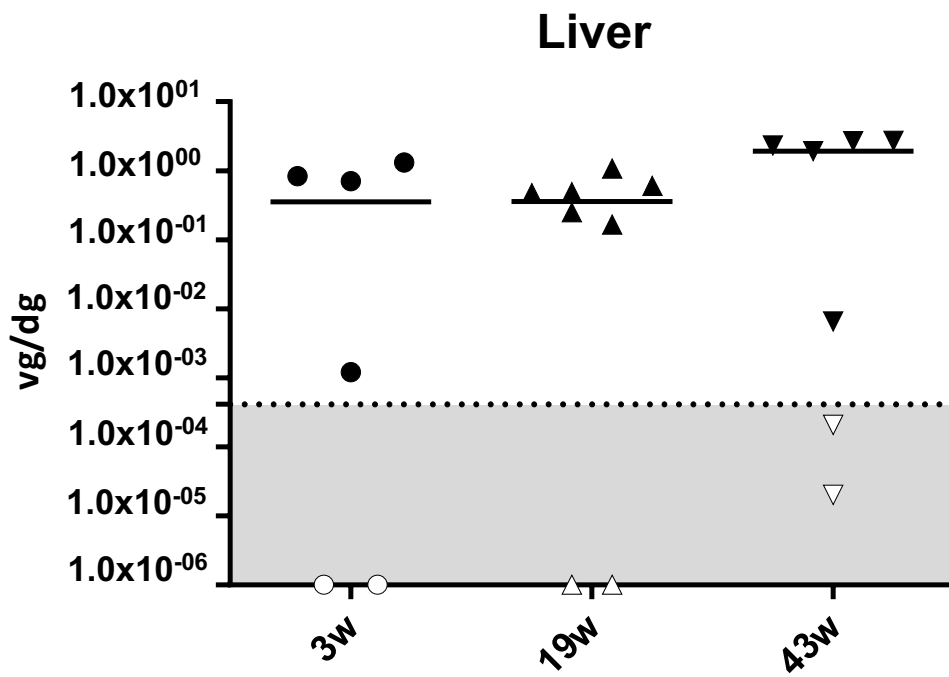

**Supplementary Figure 1: AAV vector copy in liver of Zap70-deficient mice treated with AAV8.** AAV genome copy numbers in liver samples assessed by qPCR in intrathymic AAV8–ZAP-70–transduced mice at the indicated time points. Vector genomes per diploid genome (Vg/Dg) were quantified relative to the albumin gene. White dots and white triangles represent non-injected control mice. The gray area corresponds to the limit of quantification of PCR detection:  $0.000411$  vg/dg.

A

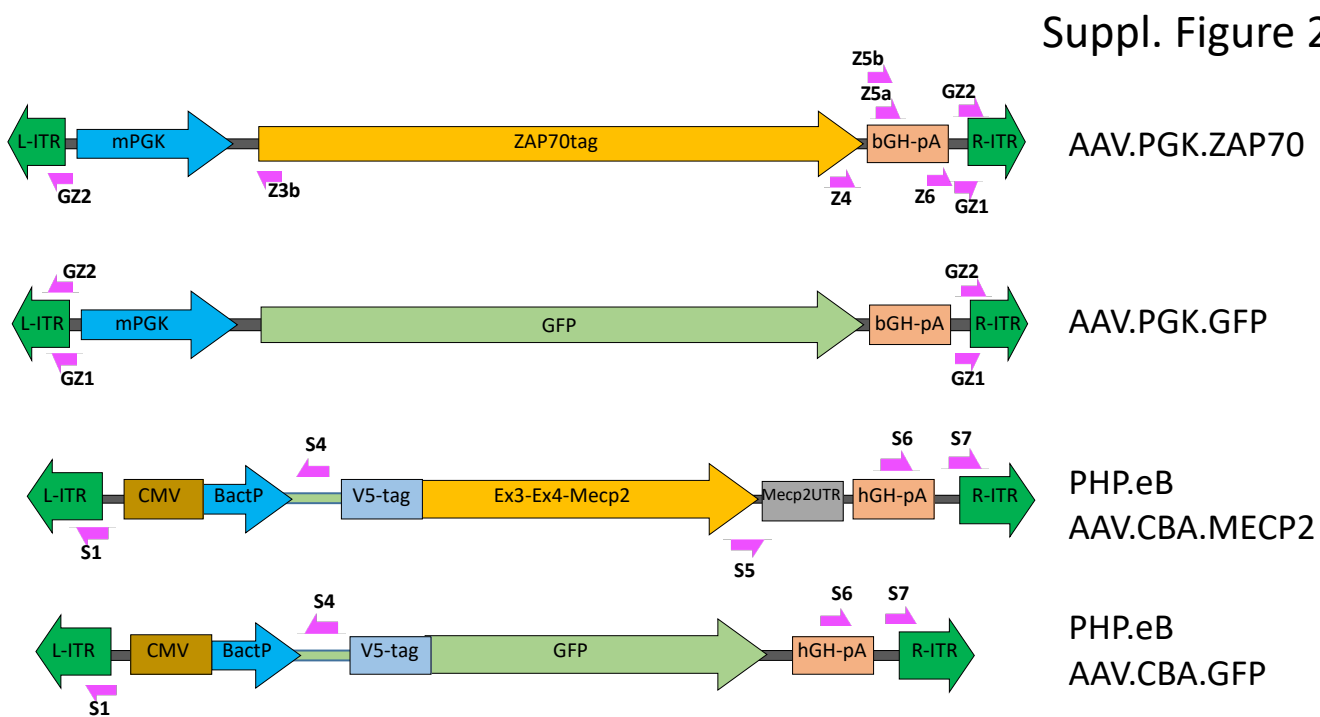

B

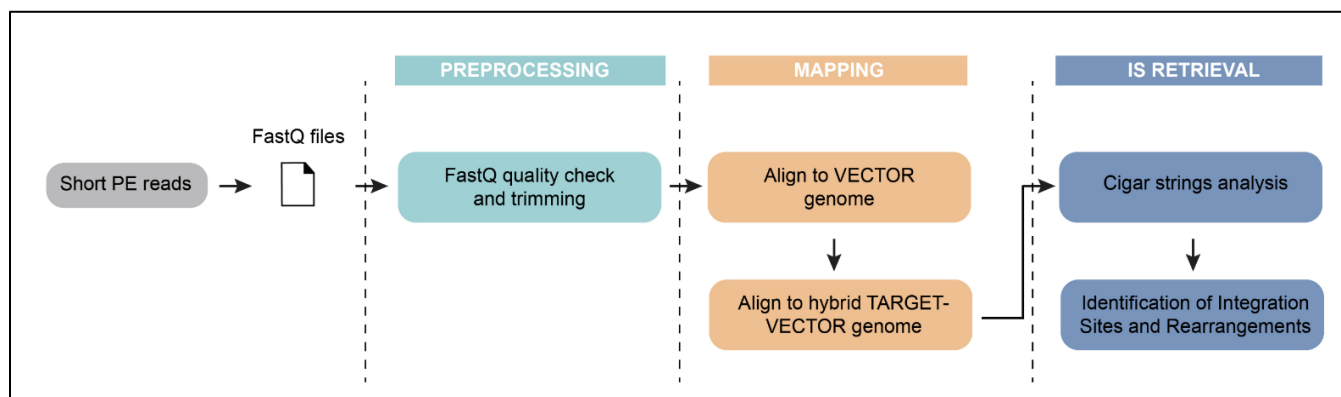

C

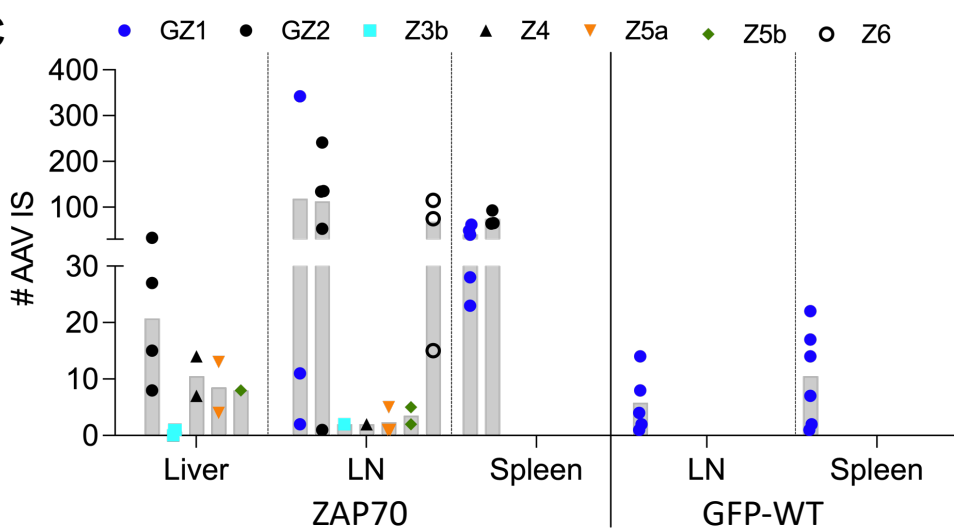

D

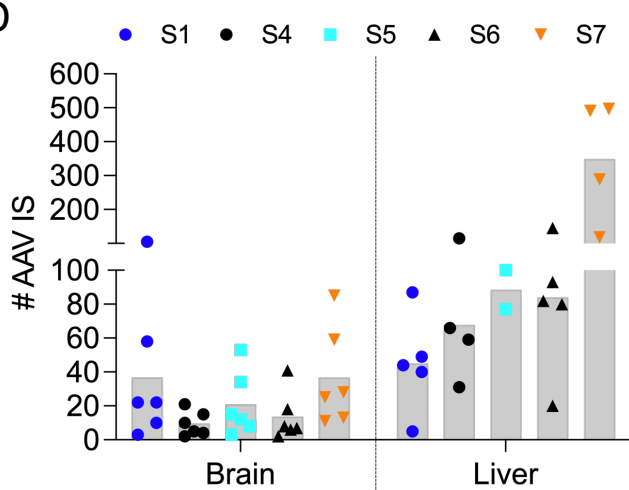

E

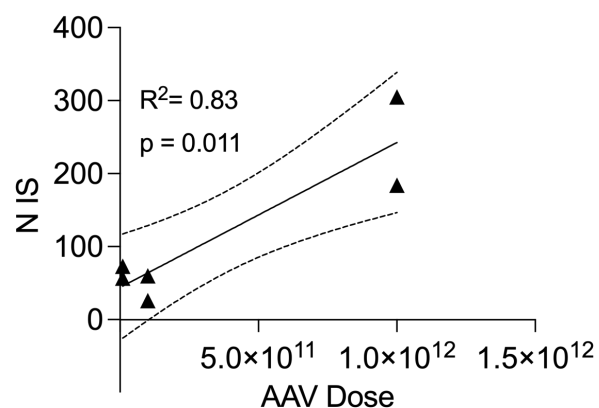

**Supplementary Figure 2: Retrieval of AAV IS.** A) Schematic representation of the genomic map of the different AAV used in the study and relative position of PCR primer sets adopted for the retrieval of IS from AAV vectors; B) Schematic workflow of the bioinformatics procedures adopted for the identification and characterization of AAV IS; C, D) Number of AAV IS retrieved by each PCR systems in intrathymic injected mice; D) Number of AAV IS retrieved by each PCR systems in *Mecp2*-deficient mice systemically injected with AAV.PHP.eB; E) Positive correlation between the number of AAV IS retrieved in the brain and the dose of vector injected in *Mecp2*-deficient mice ( $1 \times 10^{10}$ ;  $1 \times 10^{11}$  and  $1 \times 10^{12}$  vg/mouse.). Statistics was performed usign Pearson correlation test.

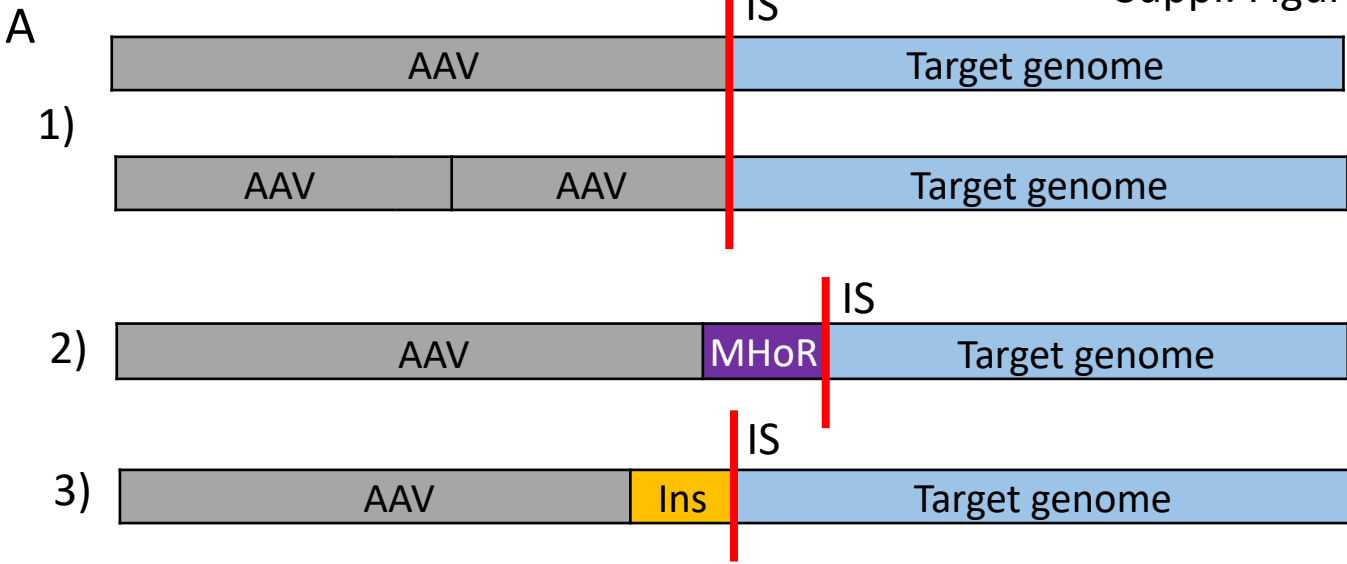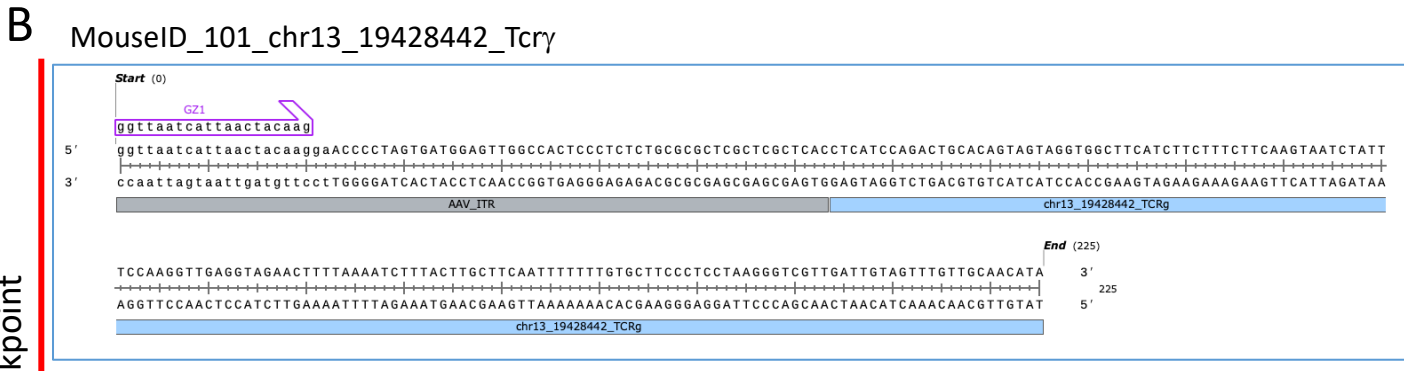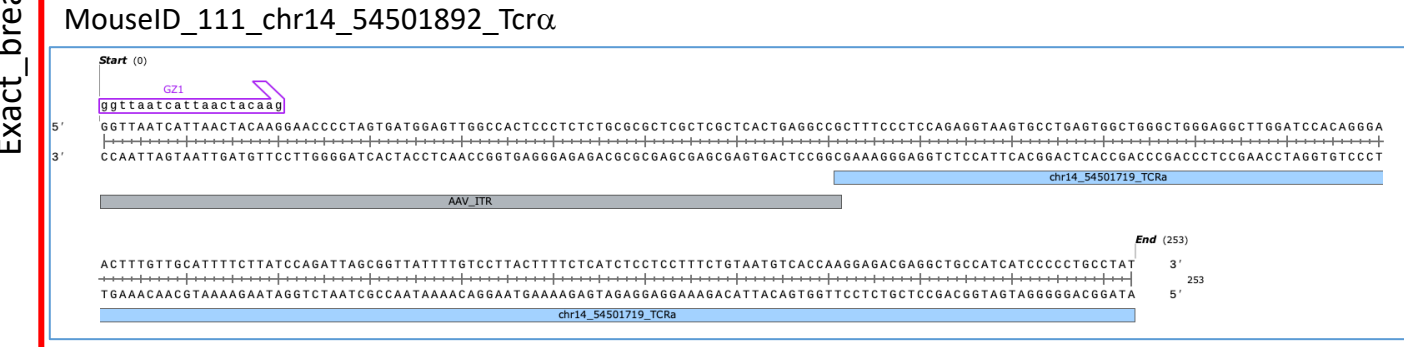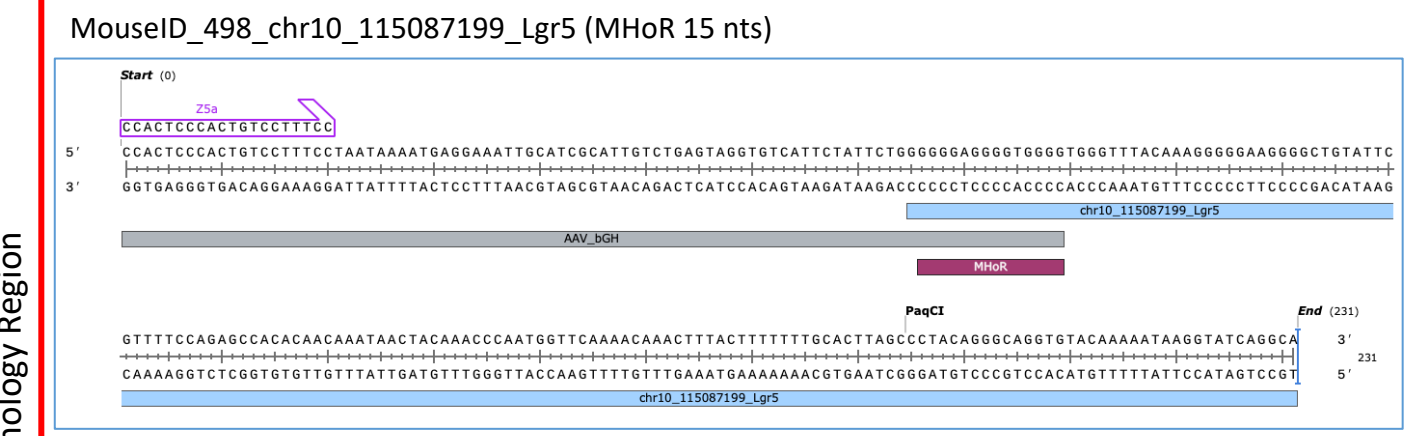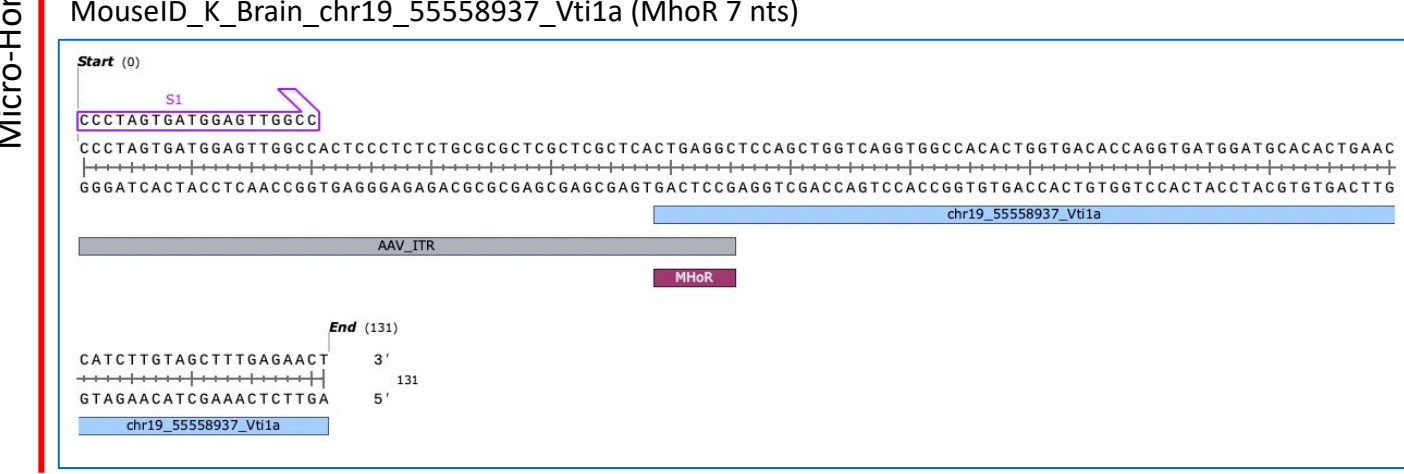

Exact\_breakpoint

Micro-Homology Region

### MouseID\_101\_LN\_chr14\_54794419\_TCRa (12 nts Ins)

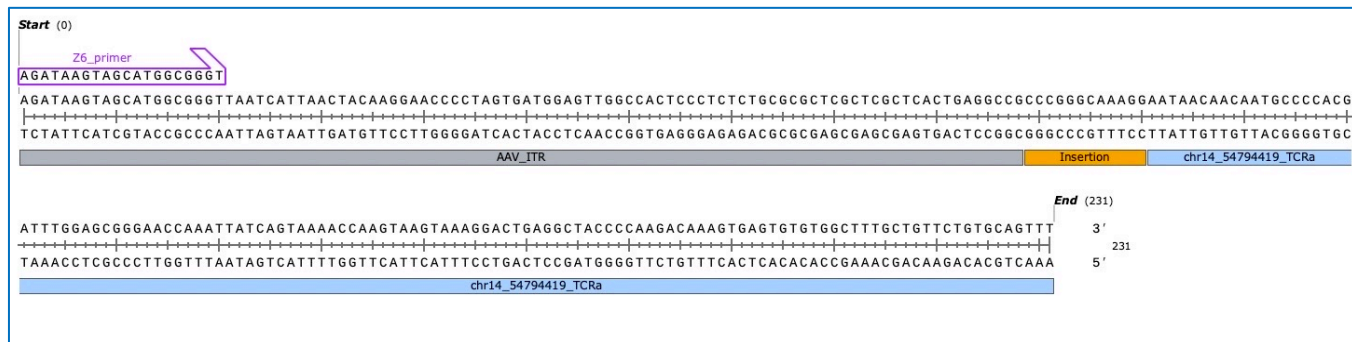

### MouseID\_101\_LN\_chr14\_54795451\_TCRa (5 nts Ins)

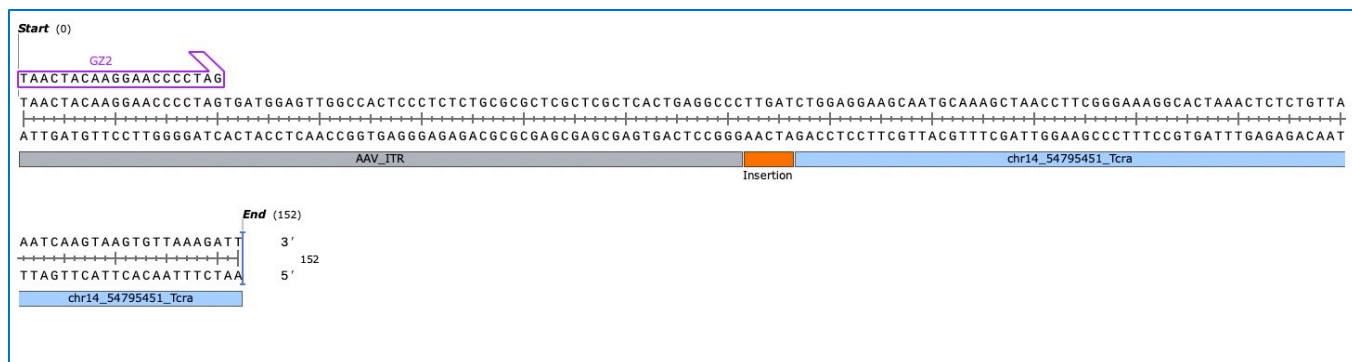

**Supplementary Figure 3: Schema and real examples of AAV/host genome chimeric reads identified by RAAVloli pipeline.** A, B) Schema of the 3 different types of AAV-containing reads identified as AAV IS by RAAVloli pipeline. Nucleotide portion aligning to the AAV genome is indicated in grey, while nucleotide portion aligning on the mouse genome is indicated in azul

1. AAV IS characterized by a precise homology breakpoint between the vector and the host chromosomal sequences, here referred as (Exact\_breakpoint);
2. AAV IS characterized by micro-homology areas between the vector and the host chromosomal sequences, here referred as (MHoR\_breakpoint), and indicated by the purple rectangle;
3. AAV IS characterized by random nucleotide insertion between the vector and the host chromosomal sequences, here referred as (Insertion\_breakpoint), and indicated by the orange rectangle.

.B) Real sequence examples of chimeric reads where AAV IS were identified. Color code is the same as previously reported.

A

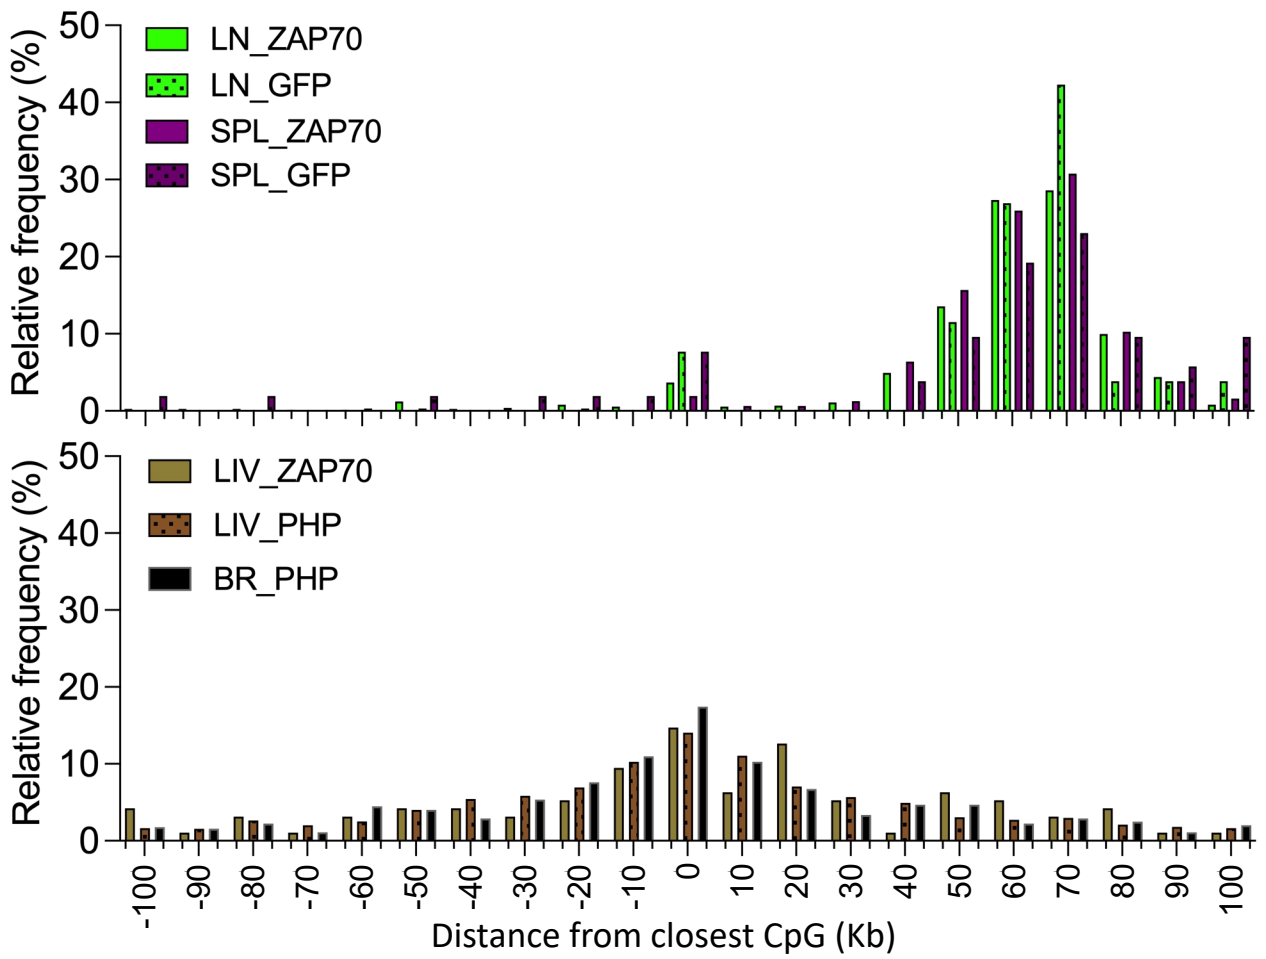

B

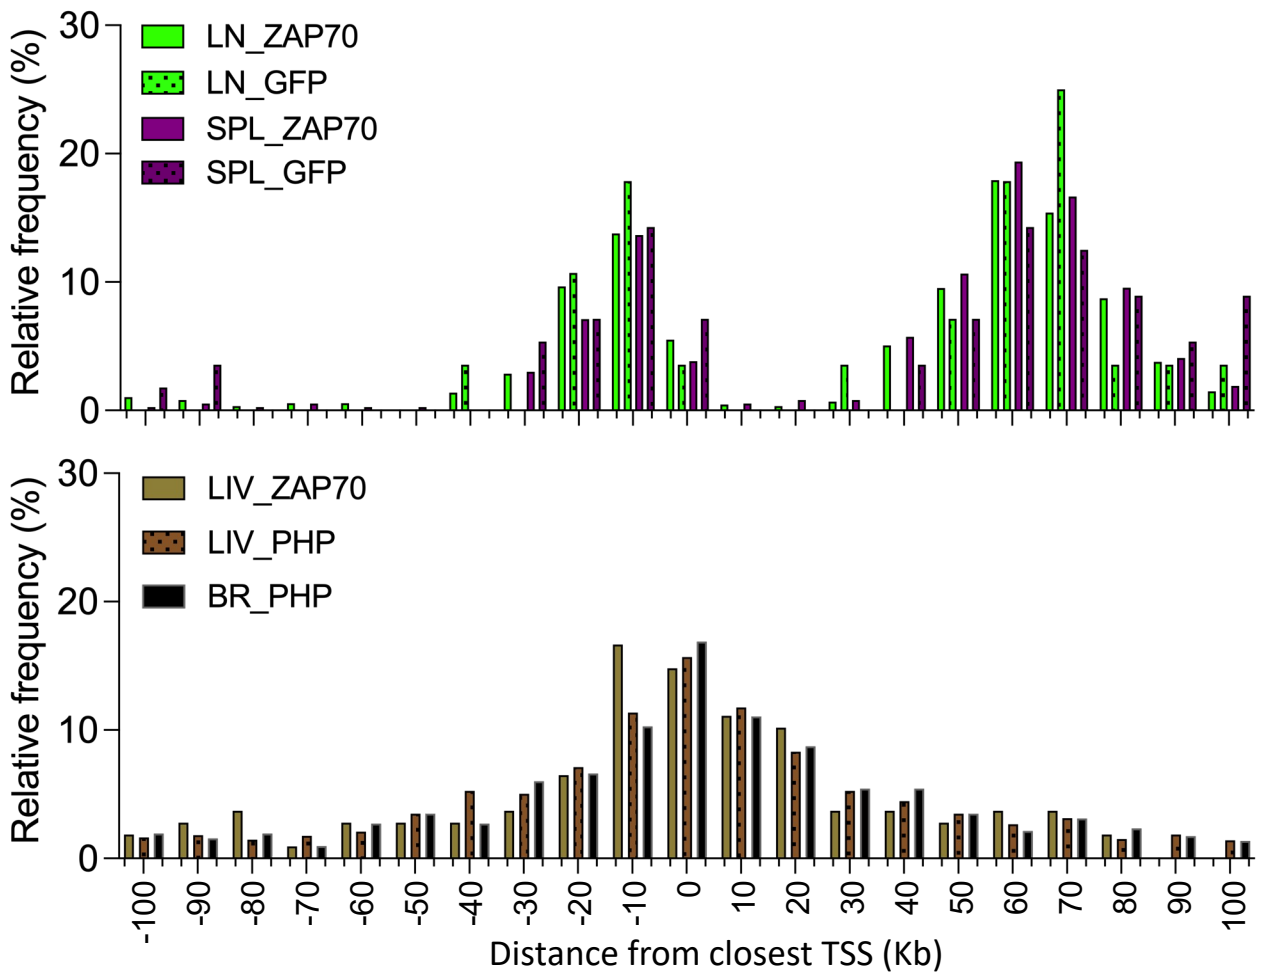

**Supplementary Figure 4: Integration site distribution in the host genome. A, B** Integration site distribution around CpG islands (A) and Transcriptional Start site (B) of RefSeq genes for the different IS datasets as indicated.

A Tcr $\alpha$  (chr14:53,047,642-54,843,873)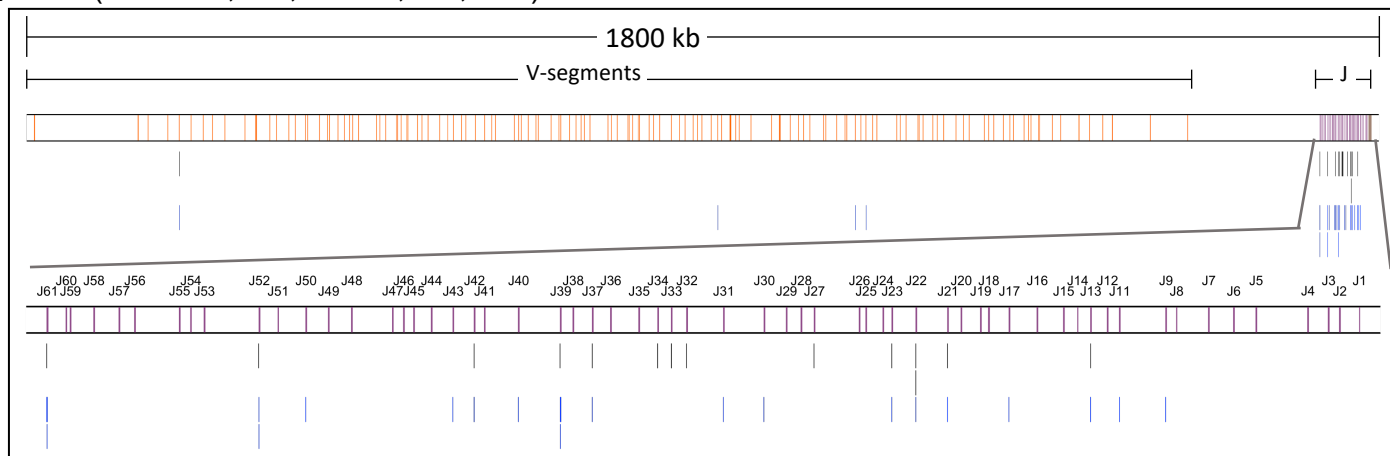B Tcr $\beta$  (chr6:40,841,295-41,508,370)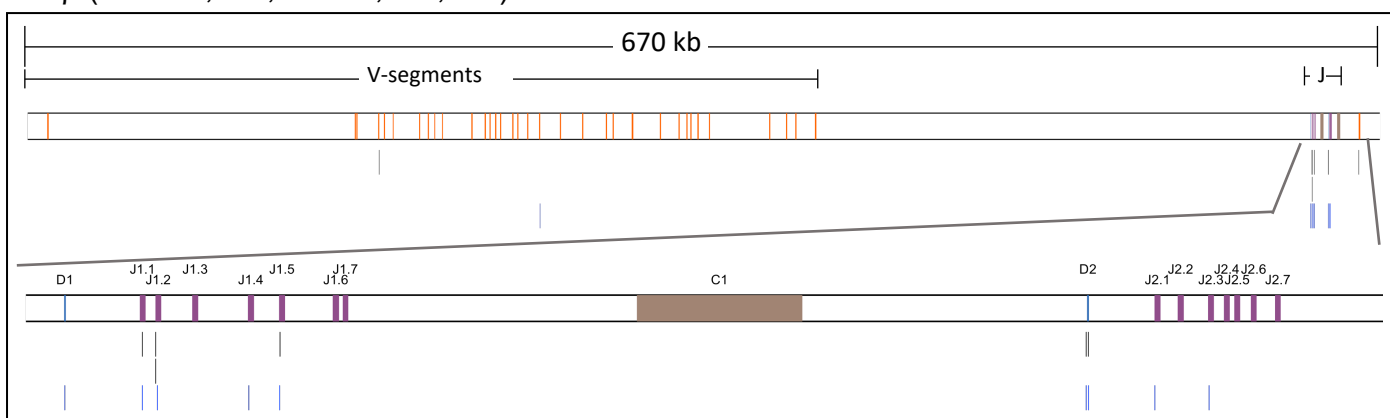C Tcr $\gamma$  (chr13:19,269,911-19,444,212)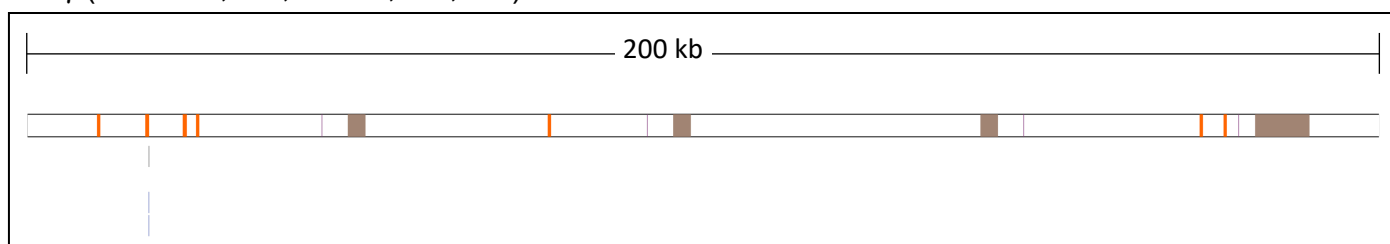

## D IgH (chr12:114,484,415-117,258,165)

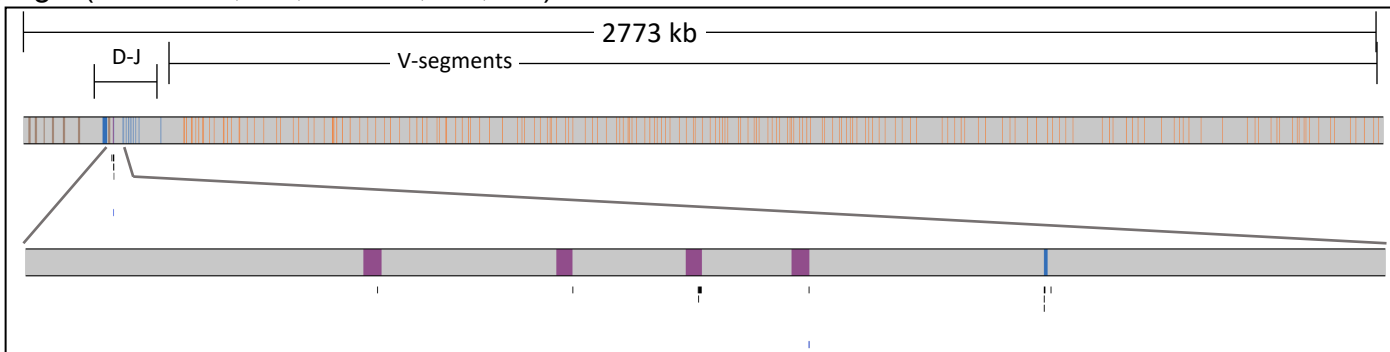

**Supplementary Figure 5: Distribution of AAV IS within Tcr loci.** A-C) Genomic distribution of AAV IS in the LN and SPL datasets of GFP-treated mice targeting TCR genes: TCR $\alpha$  (A), TCR $\beta$  (B) and TCR $\gamma$  (C), as indicated. Genomic coordinates and scale are indicated in each panel. Black and blue lines indicate the position of the AAV IS from the LN (black) and SPL (blue) datasets. Variable (V), diversity (D), and joining (J) segments are indicated by yellow, blue and purple rectangles, respectively. Constant (C) regions are represented as brown rectangles. Clusters of AAV IS are identified in TCR genes, especially in the J- segment region, whose genomic area is enlarged below the Tcr $\alpha$  and Tcr $\beta$  loci; D) Genomic distribution of AAV IS in the LN and Spleen datasets of ZAP70-treated mice targeting IgH gene. Genomic coordinates and scale are indicated in each panel. Black lines indicate the position of the AAV IS. Variable (V), diversity (D), and joining (J) segments are indicated by yellow, blue and purple rectangles, respectively. Constant (C) regions are represented as brown rectangles. Few AAV IS are identified in IgH gene especially in the J- segment region, whose genomic area is enlarged below the IgH locus. Gene segment genomic coordinates were retrieved from the IMGT®, the international ImMunoGeneTics information system® (<https://www.imgt.org>);

A. *Tcr $\alpha$* : chr14:53,037,891-54,894,005 (1,856,115 bp)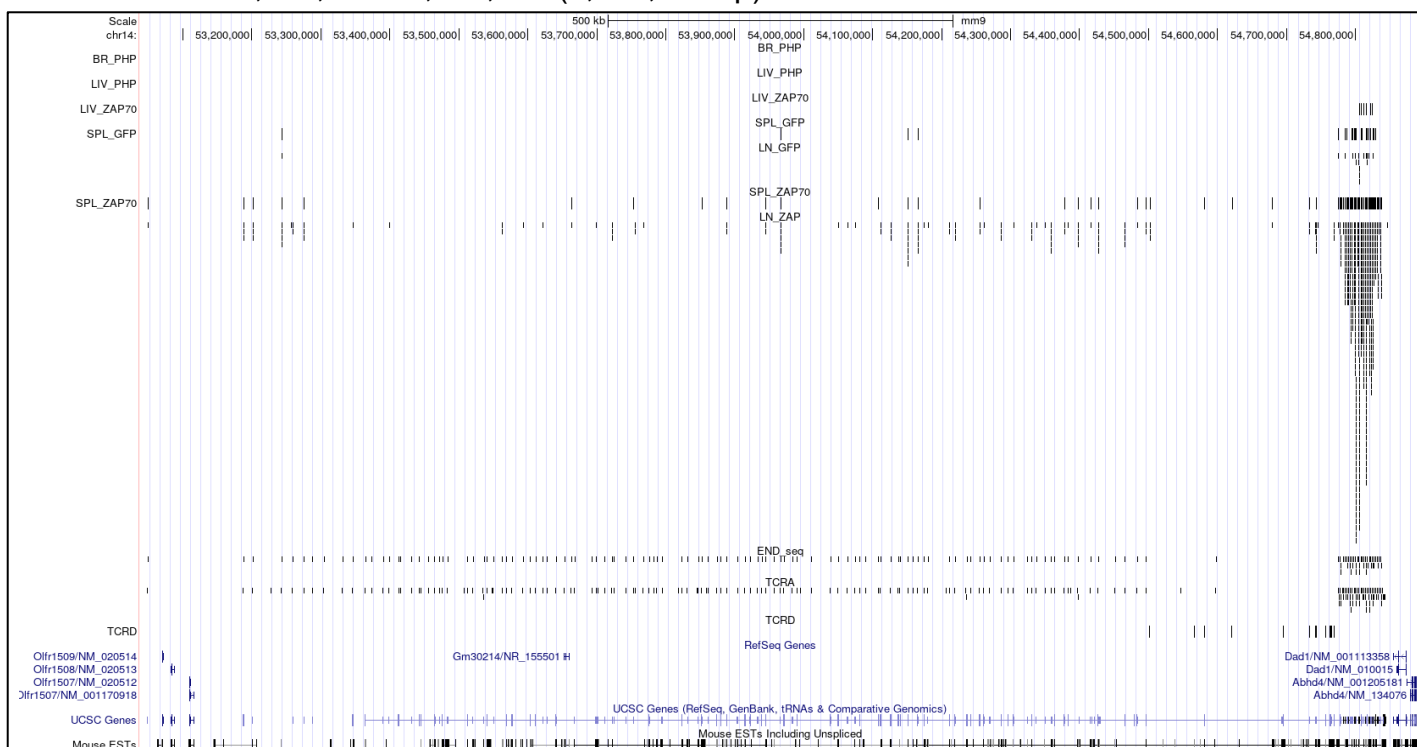

## Enlarged view of some V-gene segments: chr14:54,340,144-54,430,435 (90,292 bp)

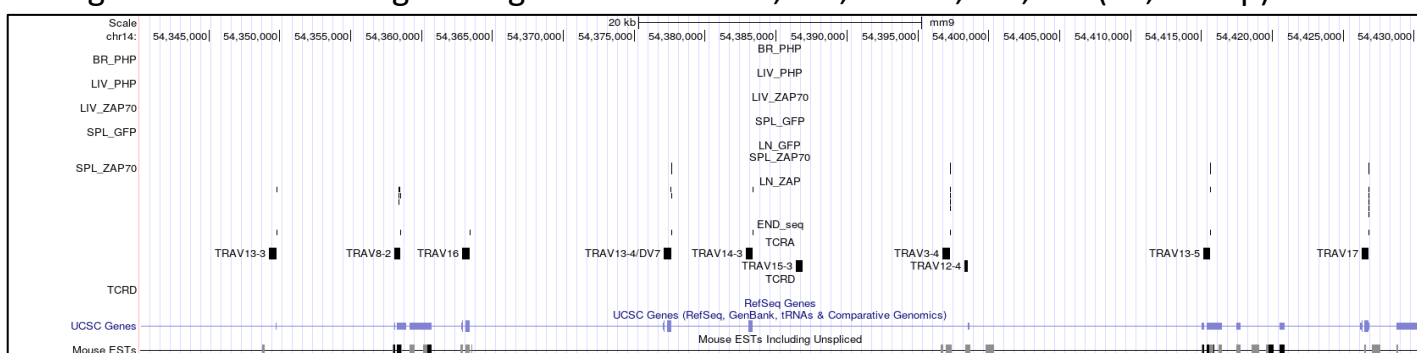

## Enlarged view of some J-gene segments: chr14:54,792,375-54,796,138 (3,764 bp)

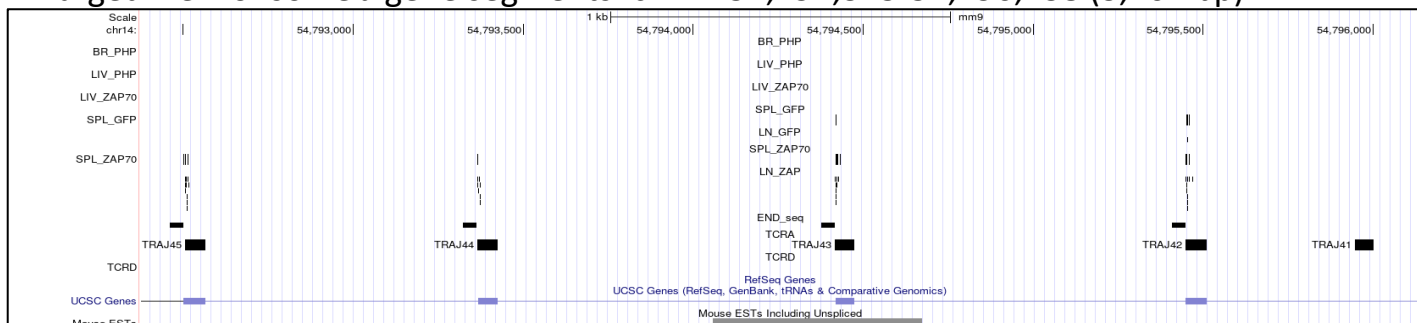B. *Tcr $\gamma$* : chr13:19,230,535-19,472,838 (242,304 bp)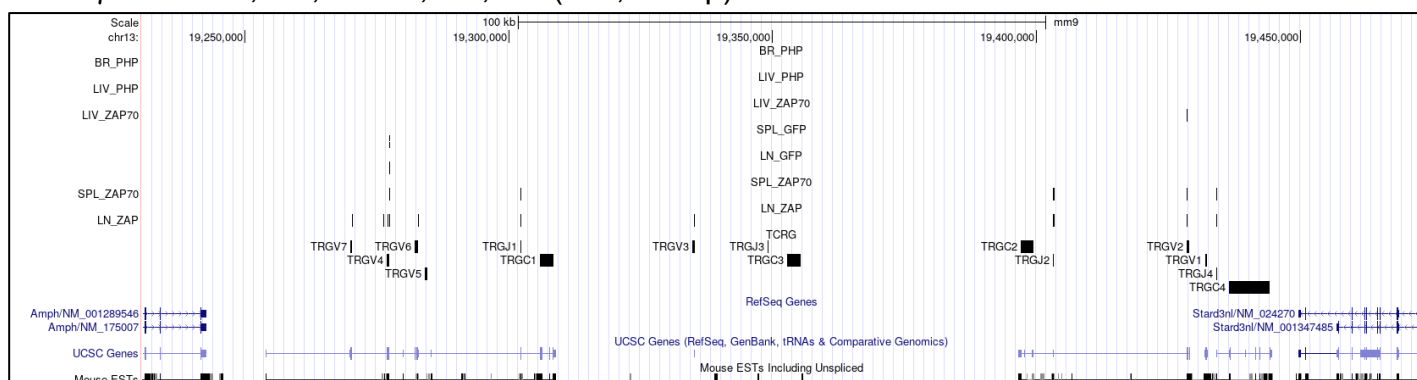



C. Tcr $\beta$ : chr6:40,817,634-41,511,995 (694,362 bp)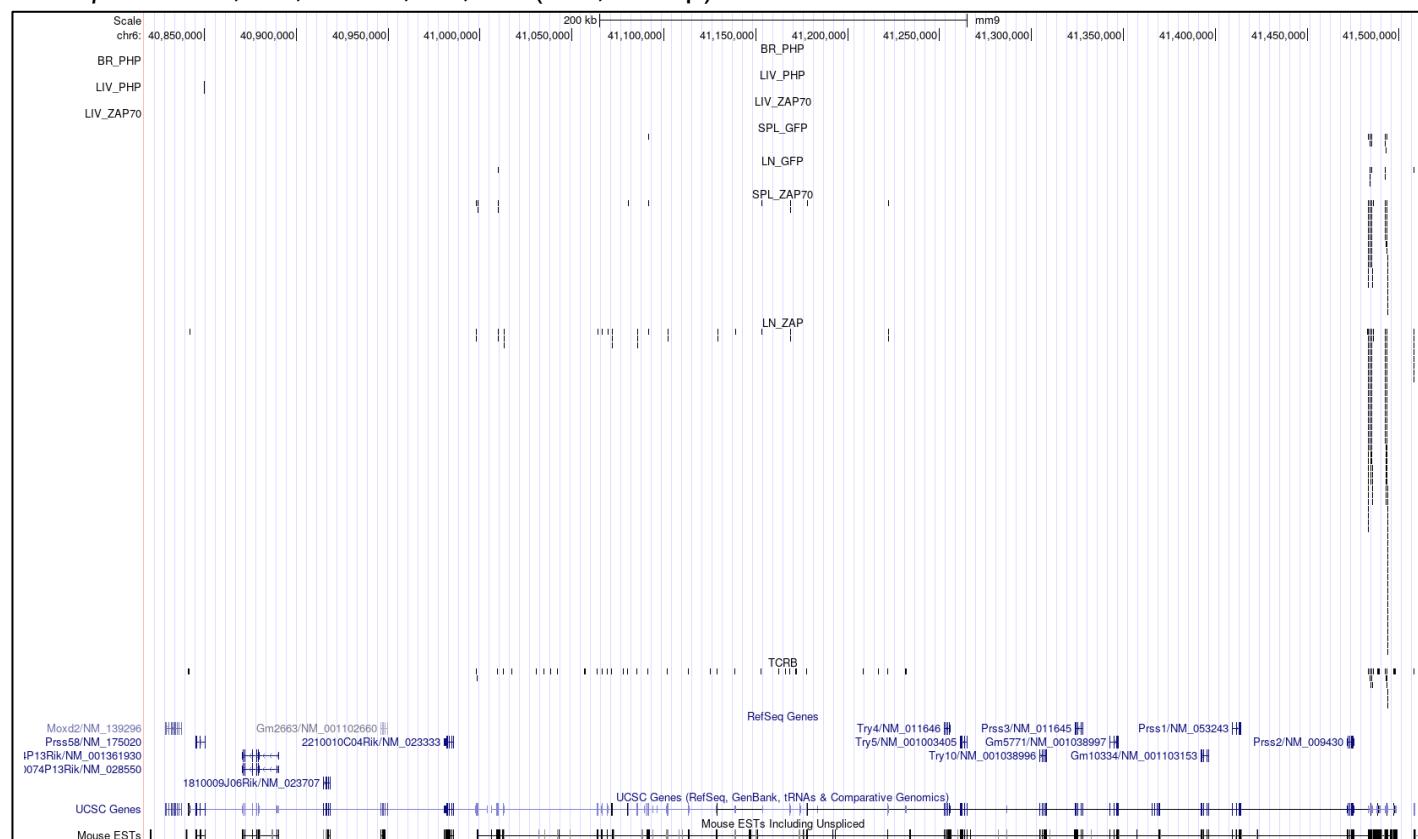

## Enlarged view of some V-gene segments: chr6:41,062,722-41,087,986 (25,265 bp)

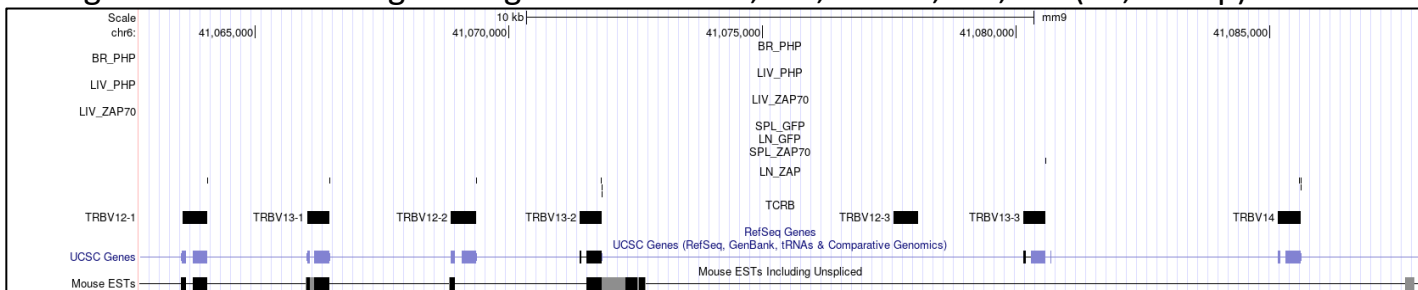

## Enlarged view of some J-gene segments: chr6:41,484,026-41,485,926 (1,901 bp)

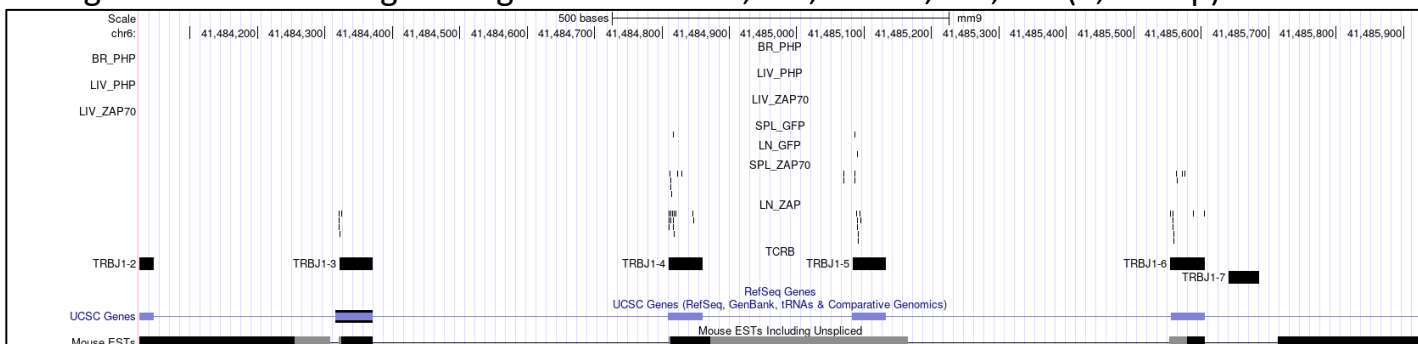

**Supplementary Figure 6: Genomic representation of mouse TCR loci and distribution of AAV IS** A-C) Genomic distribution of AAV IS observed in LN, Liver and Brain dataset and targeting TCR genes: TCR $\alpha$  (A) TCR $\gamma$  (B) and TCR $\beta$  (C), as indicated. Genomic coordinates and scale are indicated in each panel. Black lines in Brain, Liver and LN datasets indicate the position of AAV IS; Black lines below End-seq data indicate the position of breaks identified in thymocyte by End-seq, Black lines below TCRA/D, TCRB and TCRG indicate the gene segment positions identified using genomic coordinate from IMGT®, the international ImMunoGeneTics information system® (<https://www.imgt.org>). Representative enlarged genomic region containing some V and J gene segments from TCR $\alpha$  and TCR $\beta$  loci. AAV IS within TCRs clustered within the 3' region of V segments and the 5' region of J segments. Furthermore, many AAV IS in TCR $\alpha$  locus are positioned in genomic regions identified in mouse thymocyte by End-seq.

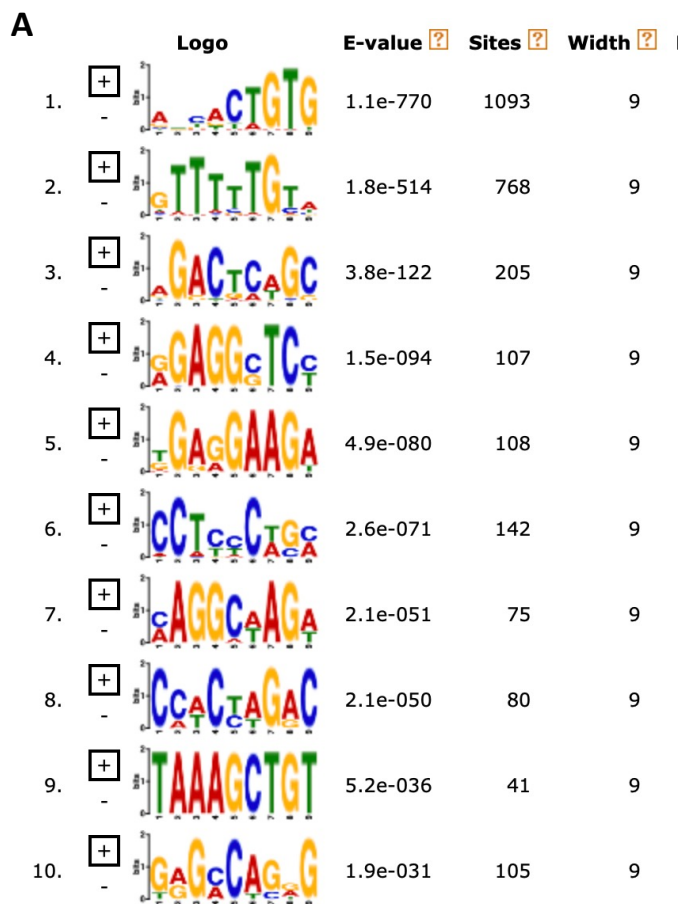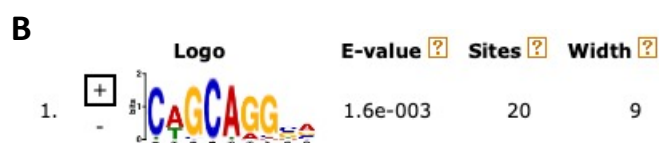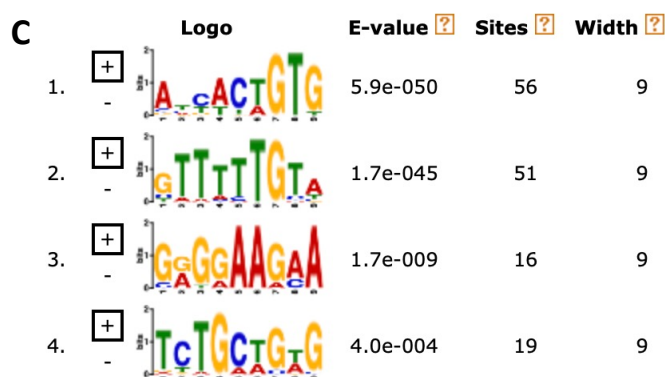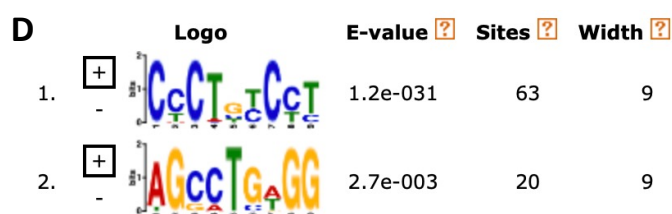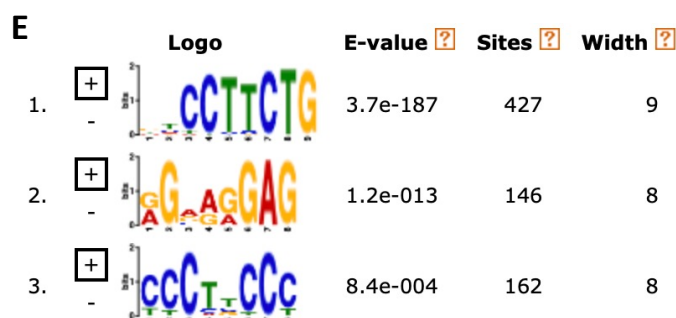

**Supplementary Figure 7: Motif logo identified in the different datasets.** Motif logo for the top 10 most significant recurrent motifs identified in the Zap70 (A) LN and spleen dataset, (B) liver, and (C) GFP LN and SPL dataset; (D) Mecp2 brain and (E) liver

**Supplementary Table 1. Sequencing reads identified by the RAAVIoli bioinformatics pipeline**

| Genotype | Group  | Vector         | Tissue | Total reads | Reads aligning only on AAV | Chimeric Reads aligning on AAV and mouse genome | %AAV_only | %chimeric |
|----------|--------|----------------|--------|-------------|----------------------------|-------------------------------------------------|-----------|-----------|
| Zap70-KO | ZAP70  | AAV.PGK.ZAP70  | LN     | 17,311,492  | 8,466,993                  | 8,844,055                                       | 48.91     | 51.09     |
|          |        |                | LIV    | 13,393,962  | 13,345,530                 | 48,430                                          | 99.64     | 0.36      |
|          |        |                | SPL    | 1,802,621   | 270,836                    | 1,531,763                                       | 15.03     | 84.97     |
| WT       | WT-GFP | AAV.PGK.GFP    | LN     | 4,177,580   | 4,167,532                  | 10,043                                          | 99.76     | 0.24      |
|          |        |                | SPL    | 1,452,426   | 1,327,069                  | 125,338                                         | 91.37     | 8.63      |
| Meep2-KO | PHP.eB | AAV.CB A.GFP   | LIV    | 30,013,851  | 29,479,228                 | 532,438                                         | 98.22     | 1.78      |
|          |        | AAV.CBA .Meep2 | BR     | 25,573,177  | 25,468,622                 | 104,359                                         | 99.59     | 0.41      |
|          |        |                | Total  | 93,725,109  | 82,525,810                 | 11,196,426                                      | 88.05     | 11.95     |

## Non-redundant AAV Integration Site identified in each sample

| Genotype | Group  | Vector        | Dose        | MouseID | TP  | Tissue | NumIS | Vg    |
|----------|--------|---------------|-------------|---------|-----|--------|-------|-------|
| WT       | GFP-WT | AAV.PGK.GFP   | 4.4x10exp10 | N10     | 10  | LN     | 1     | nd    |
|          |        |               | 4.4x10exp10 | N17     | 105 | LN     | 8     | nd    |
|          |        |               | 4.4x10exp10 | N27     | 10  | LN     | 2     | nd    |
|          |        |               | 4.4x10exp10 | N28     | 10  | LN     | 4     | nd    |
|          |        |               | 4.4x10exp10 | N29     | 10  | LN     | 14    | nd    |
|          |        |               | 5.9x10exp10 | SP1     | 30  | SPL    | 7     | nd    |
|          |        |               | 5.9x10exp10 | SP4     | 11  | SPL    | 17    | 0.004 |
|          |        |               | 5.9x10exp10 | SP8     | 11  | SPL    | 16    | 0.003 |
|          |        |               | 5.9x10exp10 | SP9     | 11  | SPL    | 22    | nd    |
|          |        |               | 5.9x10exp10 | SP13    | 11  | SPL    | 1     | nd    |
| ZAP70_KO | ZAP70  | AAV.PGK.ZAP70 | 4.6x10exp11 | 101     | 21  | LN     | 195   | nd    |
|          |        |               | 4.6x10exp11 |         |     | SPL    | 28    | nd    |
|          |        |               | 4.6x10exp11 | 103     | 301 | LIV    | 27    | nd    |
|          |        |               | 4.6x10exp11 |         |     | SPL    | 113   | nd    |
|          |        |               | 4.6x10exp11 | 104     | 301 | LIV    | 33    | nd    |
|          |        |               | 4.6x10exp11 |         |     | LN     | 225   | nd    |
|          |        |               | 4.6x10exp11 | 106     | 301 | LN     | 11    | nd    |
|          |        |               | 4.6x10exp11 |         |     | LN     | 70    | nd    |
|          |        |               | 4.6x10exp11 | 109     | 21  | LN     | 2     | nd    |
|          |        |               | 4.6x10exp11 |         |     | SPL    | 88    | nd    |
|          |        |               | 4.6x10exp11 | 110     | 21  | LN     | 1     | nd    |
|          |        |               | 4.6x10exp11 |         |     | SPL    | 103   | nd    |
|          |        |               | 4.6x10exp11 | 111     | 21  | LN     | 468   | nd    |
|          |        |               | 4.6x10exp11 |         |     | SPL    | 62    | nd    |
|          |        |               | 4.6x10exp11 | 488     | 21  | LIV    | 51    | nd    |
|          |        |               | 4.6x10exp11 | 498     | 21  | LIV    | 20    | nd    |
| MECP2_KO | PHP.eB | AAV.CBA.GFP   | 10exp12     | L       | 39  | LIV    | 492   | nd    |
|          |        |               | 10exp12     | M       | 45  |        | 269   | nd    |
|          |        | 10exp11       | P           | 75      | 25  |        | 0.01  |       |
|          |        | 10exp12       | S           | 19      | 764 |        | 23.26 |       |
|          |        | 10exp12       | T           | 19      | 938 | 35.26  |       |       |
|          |        | 10exp10       | H           | 56      | BR  | 57     | 9.03  |       |
|          |        | 10exp10       | I           | 56      |     | 73     | 13.26 |       |
|          |        | 10exp11       | D           | 112     |     | 26     | 1.75  |       |
|          |        | 10exp11       | E           | 224     |     | 60     | 16.73 |       |
|          |        | 10exp12       | J           | 21      |     | 184    | 45.41 |       |
|          |        | 10exp12       | K           | 21      |     | 305    | 2.39  |       |

**Supplementary Table 2. Analyses of the AAV vector-host genome junctions  
N IS characterized by MHoR, Insertion or Exact breakpoint at the vector-host genome junctions**

| Group (N)  | LN_ZAP70 | LIV_ZAP70 | SPL_ZAP70 | LN_GFP | SPL_GFP | LIV_PHP | BR_PHP |
|------------|----------|-----------|-----------|--------|---------|---------|--------|
| MOHR       | 55       | 36        | 19        | 1      | 11      | 1369    | 163    |
| Exact      | 218      | 66        | 114       | 8      | 18      | 841     | 436    |
| Inser      | 699      | 29        | 261       | 20     | 34      | 278     | 106    |
| MHoR/Exact | 754      | 65        | 280       | 21     | 45      | 1647    | 269    |
| Tot        | 972      | 131       | 394       | 29     | 63      | 2488    | 705    |

**% of IS characterized by MHoR, Insertion or Exact breakpoint at the vector-host genome junctions**

| Group (N)  | LN_ZAP70 | LIV_ZAP70 | SPL_ZAP70 | LN_GFP | SPL_GFP | LIV_PHP | BR_PHP | Av.   | SEM   |
|------------|----------|-----------|-----------|--------|---------|---------|--------|-------|-------|
| MOHR       | 5.66     | 27.48     | 4.82      | 3.45   | 17.46   | 55.02   | 23.12  | 19.57 | 6.91  |
| Exact      | 22.43    | 50.38     | 28.93     | 27.59  | 28.57   | 33.80   | 61.84  | 36.22 | 5.43  |
| Inser      | 71.91    | 22.14     | 66.24     | 68.97  | 53.97   | 11.17   | 15.04  | 44.21 | 10.22 |
| MHoR/Exact | 77.57    | 49.62     | 71.07     | 72.41  | 71.43   | 66.20   | 38.16  | 63.78 | 5.43  |

**Stats summary: p-value defined by Fisher exact test. P-value lowered that 0.0001 are represented.**

| G1        | G2        | P-value | Exact-pvalue |
|-----------|-----------|---------|--------------|
| LN_ZAP    | LIV_ZAP70 | <0.0001 | 4.7997E-28   |
| LN_ZAP    | LIV_PHP   | <0.0001 | 2.126E-267   |
| LN_ZAP    | BR_PHP    | <0.0001 | 8.35E-126    |
| SPL_ZAP70 | LIV_ZAP70 | <0.0001 | 6.9185E-19   |
| SPL_ZAP70 | LIV_PHP   | <0.0001 | 2.401E-117   |
| SPL_ZAP70 | BR_PHP    | <0.0001 | 1.2087E-66   |
| LN_GFP    | LIV_ZAP70 | <0.0001 | 2.5731E-06   |
| LN_GFP    | BR_PHP    | <0.0001 | 3.2942E-10   |
| LN_GFP    | LIV_PHP   | <0.0001 | 6.0082E-13   |
| SPL_GFP   | LIV_ZAP70 | <0.0001 | 1.6348E-05   |
| SPL_GFP   | LIV_PHP   | <0.0001 | 5.0548E-16   |
| SPL_GFP   | BR_PHP    | <0.0001 | 1.7053E-11   |

**Supplementary Table 3. AAV IS targeting gene transcriptional unit****N IS characterized by MHoR, Insertion or Exact breakpoint at the vector-host genome junctions**

| Bin Center | LN_ZAP70 | LIV_ZAP70 | SPL_ZAP70 | LN_GFP | SPL_GFP | LIV_PHP | BR_PHP |
|------------|----------|-----------|-----------|--------|---------|---------|--------|
| -30        | 4        | 6         | 1         | 0      | 1       | 90      | 23     |
| -10        | 16       | 0         | 1         | 0      | 2       | 252     | 71     |
| 10         | 85       | 13        | 29        | 3      | 6       | 222     | 61     |
| 30         | 36       | 10        | 11        | 0      | 3       | 202     | 60     |
| 50         | 30       | 6         | 20        | 1      | 1       | 221     | 70     |
| 70         | 80       | 11        | 21        | 0      | 3       | 216     | 72     |
| 90         | 670      | 28        | 302       | 23     | 39      | 240     | 60     |
| +10        | 21       | 17        | 6         | 1      | 1       | 249     | 76     |
| +30        | 3        | 5         | 2         | 1      | 1       | 88      | 26     |

**% of IS characterized by MHoR, Insertion or Exact breakpoint at the vector-host genome junctions**

| Bin Center | LN_ZAP70 | LIV_ZAP70 | SPL_ZAP70 | LN_GFP | SPL_GFP | LIV_PHP | BR_PHP |
|------------|----------|-----------|-----------|--------|---------|---------|--------|
| -30        | 0.41     | 4.58      | 0.25      | 0.00   | 1.59    | 3.62    | 3.26   |
| -10        | 1.65     | 0.00      | 0.25      | 0.00   | 3.17    | 10.13   | 10.07  |
| 10         | 8.74     | 9.92      | 7.36      | 10.34  | 9.52    | 8.92    | 8.65   |
| 30         | 3.70     | 7.63      | 2.79      | 0.00   | 4.76    | 8.12    | 8.51   |
| 50         | 3.09     | 4.58      | 5.08      | 3.45   | 1.59    | 8.88    | 9.93   |
| 70         | 8.23     | 8.40      | 5.33      | 0.00   | 4.76    | 8.68    | 10.21  |
| 90         | 68.93    | 21.37     | 76.65     | 79.31  | 61.90   | 9.65    | 8.51   |
| +10        | 2.16     | 12.98     | 1.52      | 3.45   | 1.59    | 10.01   | 10.78  |
| +30        | 0.31     | 3.82      | 0.51      | 3.45   | 1.59    | 3.54    | 3.69   |

**Stats summary: data for Fisher exact test**

|         | LN_ZAP70 | LIV_ZAP70 | SPL_ZAP70 | LN_GFP | SPL_GFP | LIV_PHP | BR_PHP |
|---------|----------|-----------|-----------|--------|---------|---------|--------|
| In gene | 901      | 68        | 383       | 27     | 52      | 1101    | 323    |
| Out     | 71       | 63        | 11        | 2      | 11      | 1387    | 382    |

**Stats summary: p-value defined by Fisher exact test. P-value lowered that 0.0001 are represented**

| G1        | G2        | P-value | Exact-pvalue |
|-----------|-----------|---------|--------------|
| LN_ZAP70  | LIV_ZAP70 | <0.0001 | 3.8397E-29   |
| LN_ZAP70  | LIV_PHP   | <0.0001 | 1.516E-172   |
| LN_ZAP70  | BR_PHP    | <0.0001 | 3.602E-105   |
| SPL_ZAP70 | LIV_ZAP70 | <0.0001 | 5.1537E-33   |
| SPL_ZAP70 | LIV_PHP   | <0.0001 | 8.17E-105    |
| SPL_ZAP70 | BR_PHP    | <0.0001 | 1.5935E-79   |
| LN_GFP    | LIV_ZAP70 | <0.0001 | 1.717E-05    |
| LN_GFP    | LIV_PHP   | <0.0001 | 7.2081E-08   |
| LN_GFP    | BR_PHP    | <0.0001 | 2.7351E-07   |
| SPL_GFP   | LIV_ZAP70 | <0.0001 | 3.4144E-05   |
| SPL_GFP   | LIV_PHP   | <0.0001 | 1.3108E-09   |
| SPL_GFP   | BR_PHP    | <0.0001 | 1.1109E-08   |

**Supplementary Table 4. Genes targeted by AAV IS in the different dataset**

| Dataset            | GeneID        | N IS | Targeting (%) |
|--------------------|---------------|------|---------------|
| LN_ZAP70<br>N=972  | Tcr $\alpha$  | 567  | 58.33         |
|                    | Tcr $\beta$   | 192  | 19.75         |
|                    | Tcry          | 87   | 8.95          |
|                    | IgH           | 15   | 1.54          |
|                    | Satb1         | 12   | 1.23          |
| SPL_ZAP70<br>N=394 | Tcr $\alpha$  | 257  | 65.23         |
|                    | Tcr $\beta$   | 73   | 18.53         |
|                    | Tcry          | 38   | 9.64          |
|                    | IgH           | 5    | 1.27          |
|                    | Mir684-1      | 2    | 0.51          |
| LIV_ZAP70<br>N=131 | Tcr $\alpha$  | 8    | 6.15          |
|                    | Alb           | 4    | 3.08          |
|                    | Itgam         | 2    | 1.54          |
|                    | McpH1         | 2    | 1.54          |
| LN_GFP<br>N=29     | Tcr $\alpha$  | 17   | 58.62         |
|                    | Tcr $\beta$   | 8    | 27.59         |
|                    | Tcry          | 1    | 3.45          |
| SLN_GFP<br>N=63    | Tcr $\alpha$  | 31   | 49.21         |
|                    | Tcr $\beta$   | 10   | 15.87         |
|                    | Tcry          | 2    | 3.17          |
|                    | IgK           | 2    | 3.17          |
| PHP_LIV<br>N=2488  | Alb           | 9    | 0.36          |
|                    | Diras2        | 8    | 0.32          |
|                    | Mtarch2       | 6    | 0.24          |
|                    | Msi2          | 6    | 0.24          |
|                    | Ofcc1         | 5    | 0.20          |
|                    | Tmem114       | 5    | 0.20          |
|                    | Pakap         | 5    | 0.20          |
| PHP_BR<br>N=705    | Ncam2         | 3    | 0.43          |
|                    | Prrc2b        | 3    | 0.43          |
|                    | Fars2         | 3    | 0.43          |
|                    | Atp2c2        | 3    | 0.43          |
|                    | C330004P14Rik | 2    | 0.28          |
|                    | Abca13        | 2    | 0.28          |
|                    | Specc1        | 2    | 0.28          |



**Supplementary Table 5. AAV IS close to RSS site**

**N IS close to RSS site ( $\pm 50$  bp)**

|      | LN_ZAP70 | SPL_ZAP70 | LIV_ZAP70 | LN_GFP | SPL_GFP | BR_PHP | LIV_PHP |
|------|----------|-----------|-----------|--------|---------|--------|---------|
| In   | 877      | 370       | 37        | 26     | 50      | 108    | 414     |
| Out  | 95       | 24        | 94        | 3      | 13      | 597    | 2074    |
| % In | 90.2     | 93.9      | 28.2      | 89.7   | 79.4    | 15.3   | 16.6    |

**Stats summary: p-value defined by Fisher exact test. P-value lowered that 0.0001 are represented**

| G1      | G2      | P-value | Exact-pvalue |
|---------|---------|---------|--------------|
| LN_ZAP  | LIV_ZAP | <0.0001 | 4.1186E-52   |
| LN_ZAP  | BR_PHP  | <0.0001 | 6.729E-229   |
| LN_ZAP  | LIV_PHP | <0.0001 | 0            |
| SPL_ZAP | BR_PHP  | <0.0001 | 5.696E-158   |
| SPL_ZAP | LIV_PHP | <0.0001 | 1.36E-208    |
| SPL_ZAP | LIV_ZAP | <0.0001 | 6.8564E-50   |
| LN_GFP  | BR_PHP  | <0.0001 | 1.6573E-17   |
| LN_GFP  | LIV_PHP | <0.0001 | 2.3519E-17   |
| LN_GFP  | LIV_ZAP | <0.0001 | 8.7384E-10   |
| SPL_GFP | BR_PHP  | <0.0001 | 4.9813E-26   |
| SPL_GFP | LIV_PHP | <0.0001 | 1.0682E-26   |
| LIV_ZAP | SPL_GFP | <0.0001 | 2.1665E-11   |
